## Predictable biomarkers of developing lymphoma in patients with Sjögren syndrome: a nationwide population-based cohort study

Yu-Hsiang Chiu<sup>1</sup>, Chi-Hsiang Chung<sup>2</sup>, Kuen-Tze Lin<sup>3</sup>, Chin-Sheng Lin<sup>4</sup>, Jia-Hong Chen<sup>5</sup>, Hsiang-Cheng Chen<sup>1</sup>, Ren-Yeong Huang<sup>6</sup>, Chi-Tsung Wu<sup>7</sup>, Feng-Cheng Liu<sup>1</sup> and Wu-Chien Chien<sup>2,8</sup>

<sup>1</sup> Department of Internal Medicine, Division of Rheumatology/Immunology/Allergies, Tri-Service General Hospital, National Defense Medical Center, Taipei, Taiwan

<sup>2</sup> School of Public Health, National Defense Medical Center, Taipei, Taiwan

<sup>3</sup> Department of Radiation Oncology, Tri-Service General Hospital, National Defense Medical Center, Taipei, Taiwan

<sup>4</sup> Department of Internal Medicine, Division of Cardiology, Tri-Service General Hospital, National Defense Medical Center, Taipei, Taiwan

<sup>5</sup> Department of Internal Medicine, Division of Hematology/Oncology, Tri-Service General Hospital, National Defense Medical Center, Taipei, Taiwan

<sup>6</sup> Department of Periodontology, Tri-Service General Hospital, National Defense Medical Center, Taipei, Taiwan

<sup>7</sup> Department of Oral and Maxillofacial Surgery, Tri-Service General Hospital, National Defense Medical Center, Taipei, Taiwan

<sup>8</sup> Department of Medical Research, Tri-Service General Hospital, National Defense Medical Center, Taipei, Taiwan

**Correspondence to:** Wu-Chien Chien, **email:** [chienwu@mail.ndmctsgh.edu.tw](mailto:chienwu@mail.ndmctsgh.edu.tw)

Feng-Cheng Liu, **email:** [lfc10399@yahoo.com.tw](mailto:lfc10399@yahoo.com.tw)

**Keywords:** Sjögren syndrome, non-Hodgkin's lymphoma, diffuse large B-cell lymphoma, immunosuppressive agents, lip biopsy

**Received:** August 04, 2016

**Accepted:** January 23, 2017

**Published:** February 04, 2017

Copyright: Chiu et al. This is an open-access article distributed under the terms of the Creative Commons Attribution License 3.0 (CC BY 3.0), which permits unrestricted use, distribution, and reproduction in any medium, provided the original author and source are credited.

### ABSTRACT

**Sjögren syndrome (SS) is commonly known to be correlated with lymphoma. This study included 16,396 individuals in the SS cohort and 65,584 individuals in the non-SS cohort, all of whom were enrolled in the Taiwan National Health Insurance database between 2000 and 2010. We evaluated the risk factors of non-Hodgkin's lymphoma (NHL) in the primary SS cohort by applying a Cox multivariable proportional-hazards model. We increased the correlation of patients with SS and NHL, with an adjusted HR of 4.314 (95% CI 2.784 – 6.685). Of the 16,396 SS patients, 66 individuals had salivary gland slices without NHL development, while the other 16,330 individuals that did not have salivary gland slices revealed 30 individuals that developed NHL. Of the 16,396 SS patients, 128 individuals underwent immunomodulator agent therapy (including hydroxychloroquine, azathioprine, cyclosporine, methotrexate, and rituximab) without NHL development. None of the 30 individuals that developed NHL from SS received immunomodulator agents. We found that patients with SS were at an increased risk of developing NHL, with the most common NHL subgroup being diffused large B-cell lymphoma. SS patients who were candidates for salivary gland slices or immunomodulator agents were associated with a lower risk of developing lymphoma over time. We recommend that patients at a higher risk upon diagnosis of SS receive close follow-up and aggressive treatment.**

## INTRODUCTION

Sjögren syndrome (SS) is an autoimmune disease that involves the exocrine glands and epithelia inflammation with lymphocyte infiltration, particularly in salivary and lacrimal glands, which results in inflammatory cytokines, while the activation of B lymphocytes results in autoantibody production. The most common cause of mortality in SS patients is cardiovascular disease, followed by malignancies and infections [1]. Hematologic malignancy is the most fatal complication experienced by SS patients, with an eight-fold risk of mortality when compared to normal population [2, 3]. Non-Hodgkin's lymphoma (NHL) occurs in approximately 2.7 - 9.8% of SS patients, with a greater risk than the normal population (Table 1); such patients are also at an increased risk for other autoimmune diseases [4-24]. The B-cell type was mostly seen as mucosa-associated lymphoid tissue lymphoma, nodal marginal zone lymphoma, and diffuse large B-cell lymphoma [5, 9, 21, 25].

Currently, both clinical and laboratory features have been associated with increasing risks of developing NHL from SS; such features include major salivary gland enlargement, splenomegaly, lymphadenopathy, purpura, low complement level, especially C4, monoclonal gammopathy, cryoglobulinemia, neutropenia, and lymphopenia upon diagnosis of SS [2, 16, 21, 25-31]. In 2002, the American-European consensus group (AECG) revised the classification criteria of SS [32]. The six criteria groups are classified as two groups of clinical symptoms (ocular and oral symptoms) and four groups of objective findings (ocular signs, histopathology, salivary gland objective diagnostic tests, and autoantibodies). A diagnosis is made when four (must include histopathology or serology) of the six criteria or three of the four objective findings are met. Of these criteria, histopathology from lip biopsies of minor salivary glands was the most invasive procedure. Seronegative patients, those with negative results on anti-Ro/SSA or anti-La/SSB antibodies, or those with clinical symptoms and signs are candidates for lip biopsy to meet the criteria. SS is associated with B-cell dysfunction, with a higher incidence and higher serum levels of the B-cell activating factor [33, 34].

The purposes of this study are to provide an overview of the risk of NHL and its subtypes in SS patients and to recognize the related risk factors and correlations with other preexisting comorbidities, such as diabetes, hypertension, depression, stroke, dementia, or chronic kidney disease. We hypothesized that reduced B lymphocyte activity, including seronegative SS (negative on anti-Ro and anti-La), and patients that received immunomodulator agents, could reduce the subsequent risk of lymphoma. We also attempted to identify whether the risk was reduced in SS patients by studying candidates from lip biopsy who were found to be seronegative upon their diagnosis of SS.

## MATERIALS AND METHODS

### Data source

The National Health Insurance (NHI) program has been the single payer providing comprehensive medical care for all people in Taiwan since March 1, 1995. As of June 2015, 23,644,464 people were enrolled in NHI through 817,902 insurance registration organizations [35]. The National Health Insurance Research Database (NHIRD) consists of the claims records from Taiwan's universal NHI program, which was established by the National Health Research Institute (NHRI). All personal identification information is encrypted prior to the data being released for research purposes in order to protect patient privacy. The NHIRD has been described in detail in previous studies [36, 37].

In this study, we used a NHIRD subset that contained healthcare data, including files from the Longitudinal Health Insurance Database (LHID) with disease histories of outpatients. Between 1997 and 2010, 980,157 people were insured and were then used as the database pool. The diagnoses and procedures recorded in the NHIRD are coded according to the International Classification of Diseases, Ninth Revision, Clinical Modification (ICD-9-CM). This study was approved by the Institutional Review Board of Tri-Service General Hospital and National Defense Medical Center in Taiwan (B-104-21).

### Sampled patients

We conducted a population-based retrospective cohort study to determine the relationship between SS and the risk of developing NHL. Patients newly diagnosed with primary SS (ICD-9-CM code 710.2) between 2000 and 2010 were identified in the LHID (Figure 1). The SS diagnosis was based on ICD-9-CM codes, which were judged and determined by related specialists and physicians according to the standard clinical/laboratory/pathology criteria of the American-European Consensus Group [32]. The index date represents the date on which a patient was first diagnosed with SS. We excluded any patients with a history of NHL (ICD-9-CM code 200.0-200.7, 202.0-202.2, 202.7) prior to follow-up, had incomplete information with regard to gender, or were younger than 20 years old. For the non-SS cohort, we randomly chose patients without any history of SS from the LHID and frequency-matched them with the SS patients using a 4:1 ratio based on gender, age within an interval of five years, and the year of the index date. The exclusion criteria for the non-SS cohort were the same as the SS cohort.

**Table 1: Previous study of Sjögren's syndrome related to lymphoma.**

| No. | Year | Study design                                                                                                                                        | The relation of lymphoma to Sjögren's syndrome                                                                                              | Reference (First Author) |
|-----|------|-----------------------------------------------------------------------------------------------------------------------------------------------------|---------------------------------------------------------------------------------------------------------------------------------------------|--------------------------|
| 1   | 1964 | Cohort of 38 patients with Sjögren's syndrome                                                                                                       | 10.5 % (4/38) developed lymphoma                                                                                                            | Talal, N.                |
| 2   | 1978 | Cohort of 136 women with sicca syndrome                                                                                                             | 5.1 % (7/136) developed non-Hodgkin's lymphoma                                                                                              | Kassan, S. S.            |
| 3   | 1992 | Cohort of 120 patients with primary Sjögren's syndrome                                                                                              | 6.7 % (8/120) developed non-Hodgkin's lymphoma                                                                                              | Pavlidis, N. A.          |
| 4   | 1996 | Cohort of 103 patients with primary Sjögren's syndrome from 1986 to 1991                                                                            | 6.8 % (7/103) developed lymphoma                                                                                                            | Tzioufas, A. G.          |
| 5   | 1997 | Cohort of 676 patients with primary Sjögren's syndrome, 709 with secondary Sjögren's syndrome                                                       | The standardized incidence ratio of non-Hodgkin's lymphoma was 8.7 for primary Sjögren's syndrome and 4.5 for secondary Sjögren's syndrome. | Kauppi, M.               |
| 6   | 1997 | Sjögren's syndrome detected among 33 newly diagnosed untreated patients with non-Hodgkin's lymphoma                                                 | 6 % (2/33) detected Sjögren's syndrome, both were male with lung and stomach non-Hodgkin's lymphoma                                         | Andonopoulos, A. P.      |
| 7   | 1997 | Cohort of 331 patients with Sjögren's syndrome                                                                                                      | 2.7 % (9/331) developed non-Hodgkin's lymphoma                                                                                              | Valesini, G.             |
| 8   | 1999 | Cohort of 100 patients with primary Sjögren's syndrome                                                                                              | 3 % (3/100) developed non-Hodgkin's lymphoma, 2 were parotid, and 1 was retroperitoneal                                                     | Davidson, B. K.          |
| 9   | 2000 | Cohort of 261 patients with primary Sjögren's syndrome                                                                                              | 3.4 % (9/261) developed lymphoma                                                                                                            | Skopouli, F. N.          |
| 10  | 2001 | Cohort of 111 patients with primary Sjögren's syndrome diagnosed in 1977-1992                                                                       | 2.7 % (3/111) developed non-Hodgkin's lymphoma, with standardized incidence ratio 13                                                        | Pertovaara, M.           |
| 11  | 2005 | Meta-analysis 5 cohort                                                                                                                              | 2.3 % (30/1323) developed lymphoma, the standardized incidence rate was 18.8                                                                | Zintzaras, E.            |
| 12  | 2006 | Retrospective evaluation 112 patients with primary Sjögren's syndrome                                                                               | 9.8 % (11/112) developed lymphoma (either before or after development of pSS),                                                              | Lazarus, M. N.           |
| 13  | 2006 | Population-based case-control study, 3055 NHL patients and 3187 matched control                                                                     | Primary Sjögren syndrome had an odds ratio of 6.1 in non-Hodgkin's lymphoma, subtype mentioned in article                                   | Smedby, K. E.            |
| 14  | 2008 | Pooled analysis of individual data from 8 case-control studies that reported history of Sjögren's syndrome in patients with non-Hodgkin's lymphoma, | 0.6 % (52/8178) of patients with non-Hodgkin's lymphoma had a history of Sjögren's syndrome, 0.3 % (23/8176) had primary Sjögren's syndrome | Ekstrom Smedby, K.       |
| 15  | 2009 | Cohort of 536 patients with primary Sjögren's syndrome from 1981 to 2008                                                                            | 7.4 % (40/536) developed lymphoma, subtype mentioned in article                                                                             | Baimpa, E.               |
| 16  | 2011 | Cohort of 445 patients with primary Sjögren's syndrome from 1985 to 2009                                                                            | 4 % (18/445) developed lymphoma                                                                                                             | Martel, C.               |
| 17  | 2011 | Cohort of 244 patients with primary Sjögren's syndrome                                                                                              | 4.5 % (11/244) developed non-Hodgkin's lymphoma, subtype mentioned in article                                                               | Solans-Laqué, R.         |
| 18  | 2011 | Cohort of 175 patients with primary Sjögren's syndrome and with a median onset of 7 years following                                                 | 4% (7/175) developed non-Hodgkin's lymphoma                                                                                                 | Theander, E.             |
| 19  | 2012 | Cohort of 584 patients with Sjögren's syndrome from 1980 to 2010                                                                                    | The prevalence was 3.6% (6/163) in 1995, 4.3% (17/399) in 2000, and 7.5% (40/536) in 2008, subtype mentioned in article                     | Voulgarelis, M.          |
| 20  | 2012 | Cohort of 7852 patients with primary Sjögren's syndrome from 2000 to 2008                                                                           | Standardized incidence ratio of 7.08 in female patients compared with the general population                                                | Weng, M. Y.              |
| 21  | 2014 | Retrospective evaluation 1115 patients with primary Sjögren's syndrome                                                                              | 4.5 % (50/1115) developed non-Hodgkin's lymphoma                                                                                            | Baldini, C.              |



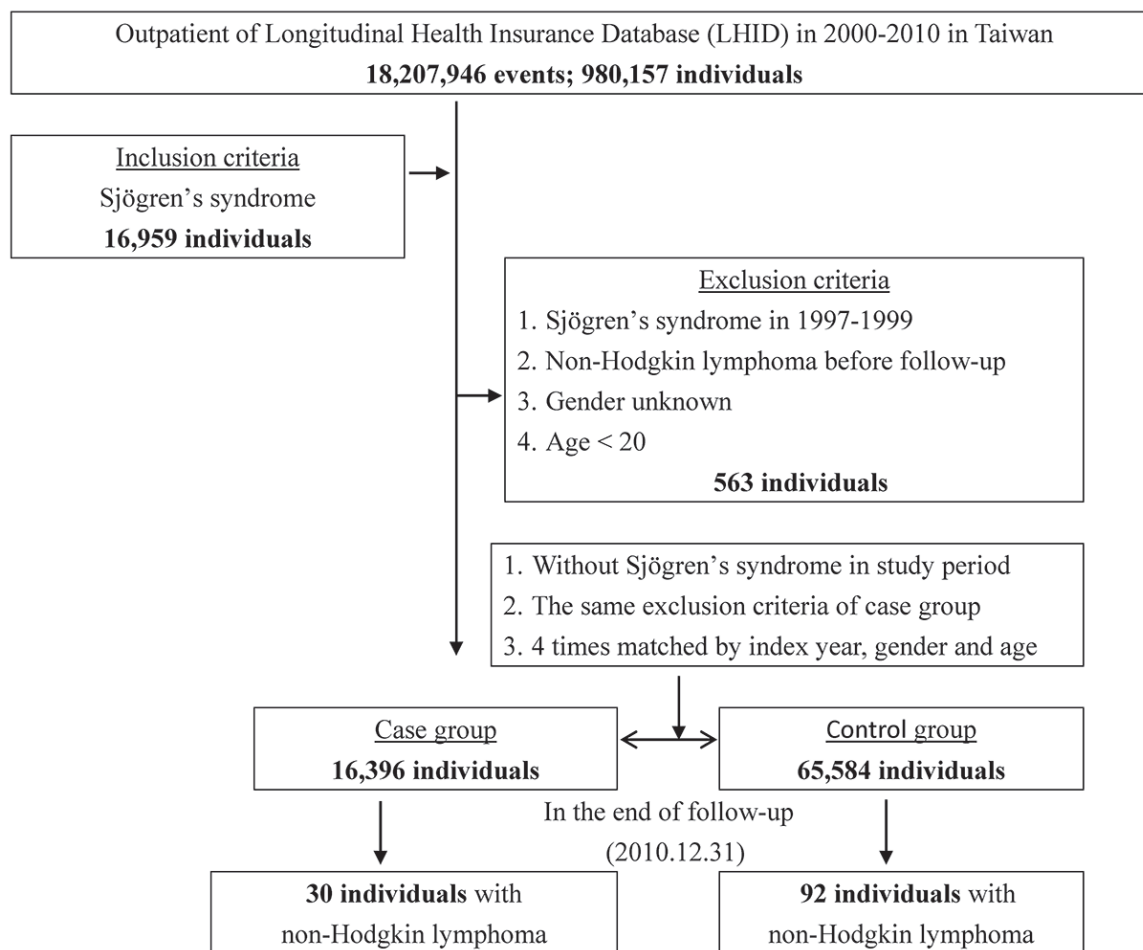

Figure 1: The flowchart of study sample selection from Taiwan's National Health Insurance Research Database.

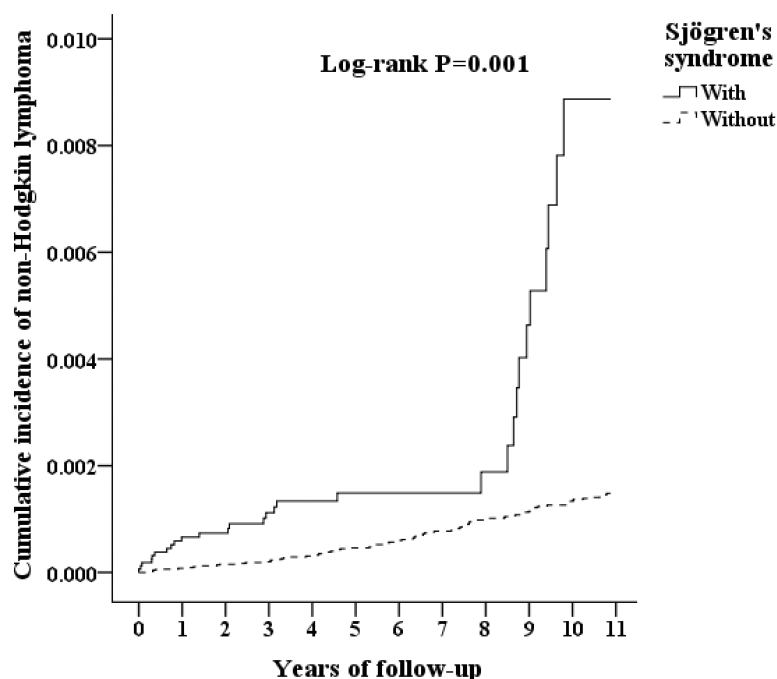

Figure 2: Kaplan-Meier for cumulative incidence of non-Hodgkin's lymphoma among patients aged 20 and over stratified by Sjögren's syndrome using the log-rank test.











Approach in the SICCA Cohort. *Arthritis Care Res (Hoboken)*. 2012; 64:475-487.

58. Vivino FB, Carsons SE, Foulks G, Daniels TE, Parke A, Brennan MT, Forstot SL, Scofield RH, Hammitt KM. New Treatment Guidelines for Sjogren's Disease. *Rheum Dis Clin North Am*. 2016; 42:531-551.
